# Supplementary material
Source: PubMed Central journal article supplement (PMC7904650)
Supplement: NIHMS1656523-supplement-Supplementary_Material.pdf [file NIHMS1656523-supplement-Supplementary_Material.pdf]

**Figure S1.** Scatter plot of bioelectrical impedance analysis (BIA) measured percent fat and body mass index (BMI), waist to hip ratio, or predicted percent fat at visit 5 with generalized additive regression line.

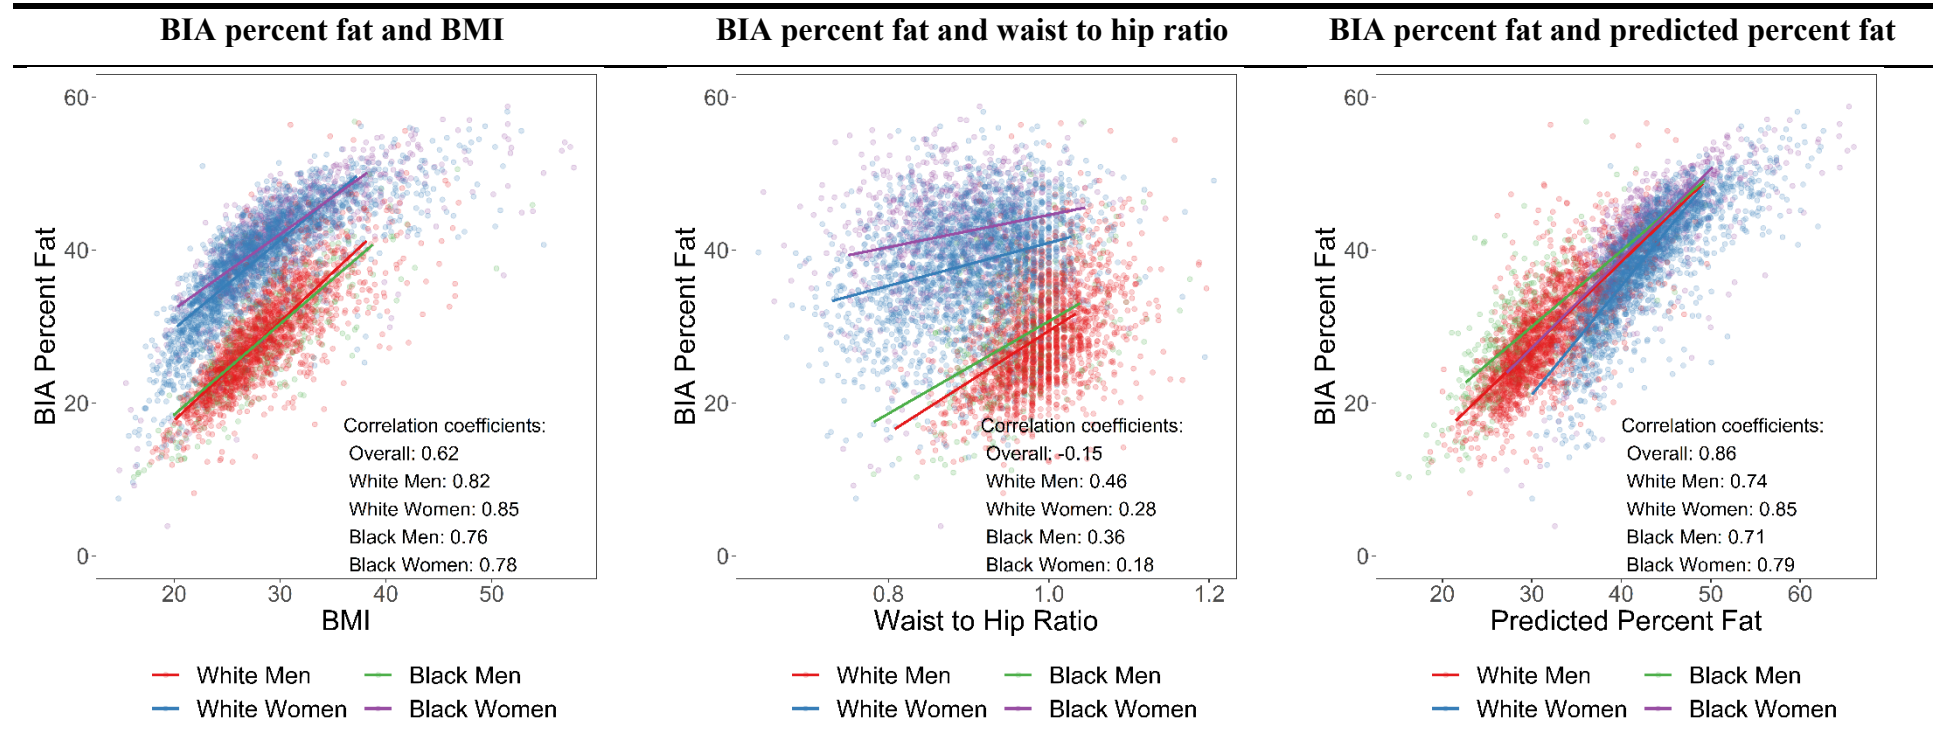

All p-values are <0.001

Figure S2. Distributions of waist to hip ratio and predicted percent fat according to baseline body mass index (BMI) tertile by sex and race.

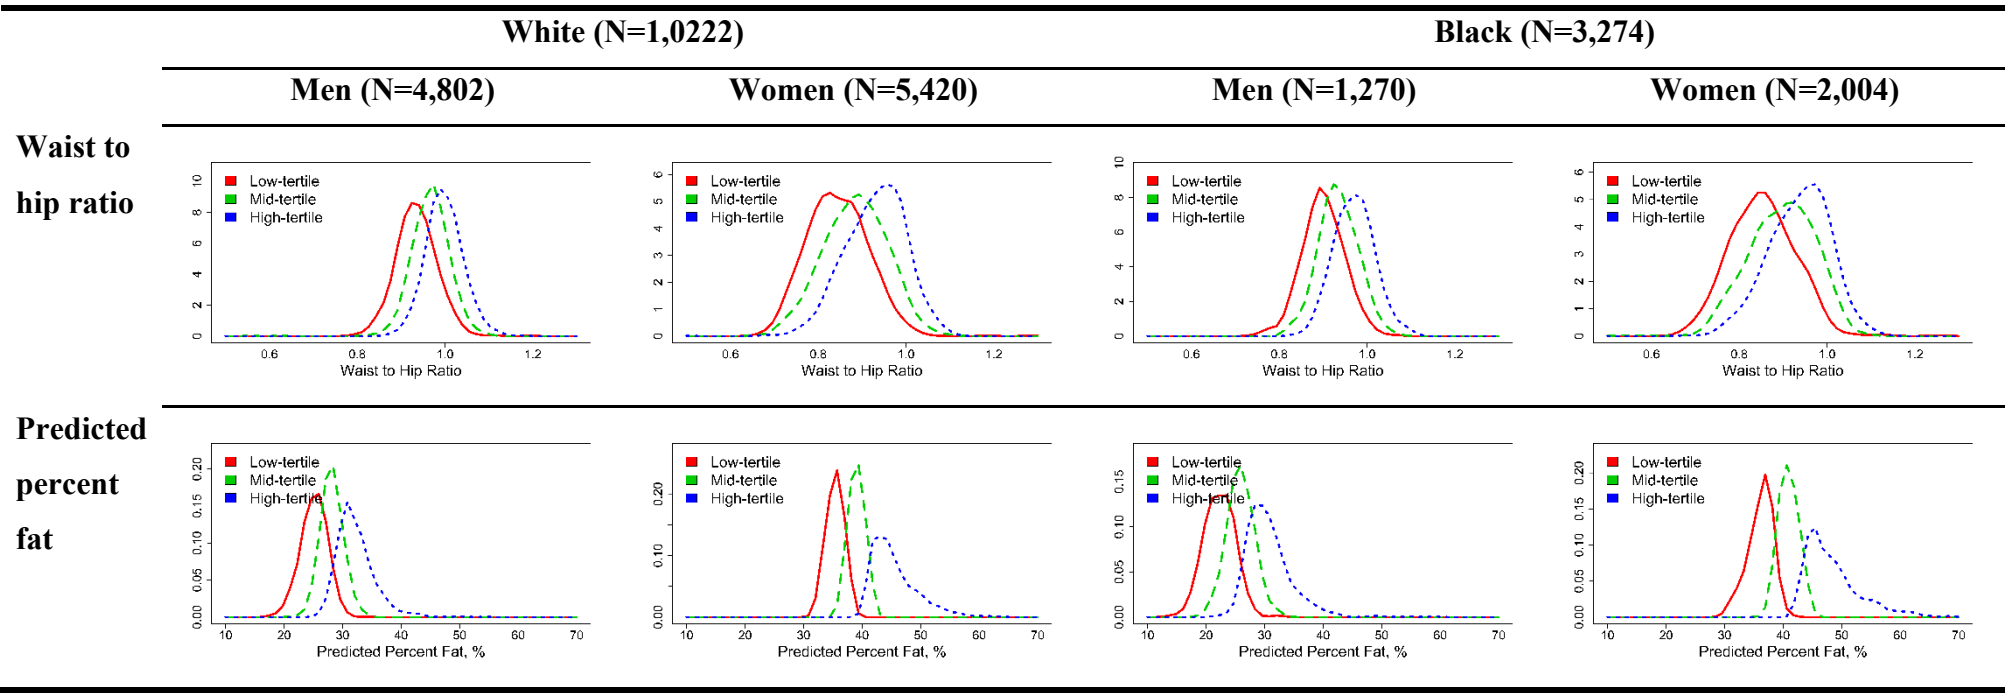

**Figure S3.** Kaplan-Meier survival free of kidney failure with replacement therapy (KFRT) by tertile of baseline obesity measure within each sex-race group showing absolute risk of KFRT.

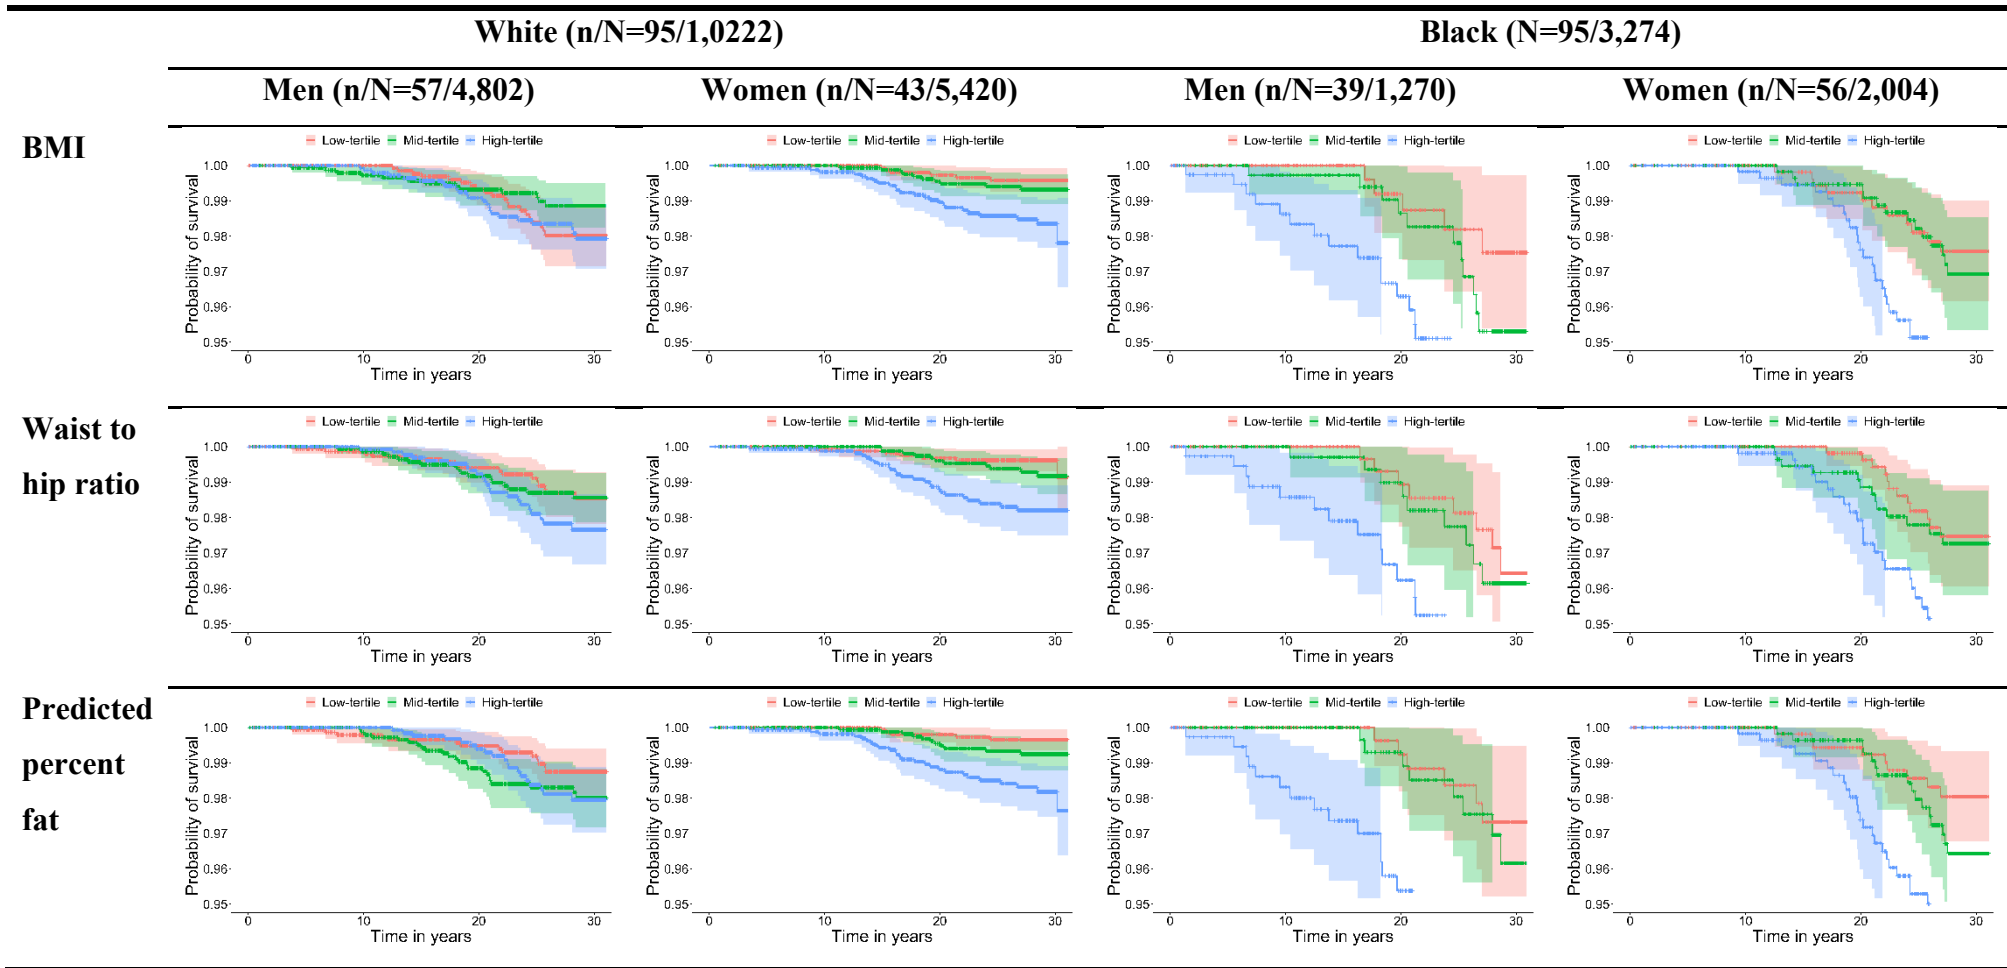

**Table S1.** Difference in estimated glomerular filtration rate (eGFR) decline slope (unit: ml/min per 1.73 m<sup>2</sup> per decade) according to baseline obesity status tertile by sex and race.

|                              | White (N=1,0222)             |                              |                               |                              |                              |                               | Black (N=3,274)            |                            |                             |                            |                            |                             |
|------------------------------|------------------------------|------------------------------|-------------------------------|------------------------------|------------------------------|-------------------------------|----------------------------|----------------------------|-----------------------------|----------------------------|----------------------------|-----------------------------|
|                              | Men (N=4,802)                |                              |                               | Women (N=5,420)              |                              |                               | Men (N=1,270)              |                            |                             | Women (N=2,004)            |                            |                             |
|                              | Low-<br>tertile<br>(N=1,601) | Mid-<br>tertile<br>(N=1,600) | High-<br>tertile<br>(N=1,601) | Low-<br>tertile<br>(N=1,809) | Mid-<br>tertile<br>(N=1,803) | High-<br>tertile<br>(N=1,808) | Low-<br>tertile<br>(N=423) | Mid-<br>tertile<br>(N=424) | High-<br>tertile<br>(N=423) | Low-<br>tertile<br>(N=668) | Mid-<br>tertile<br>(N=668) | High-<br>tertile<br>(N=668) |
|                              | <b>BMI</b>                   |                              |                               |                              |                              |                               |                            |                            |                             |                            |                            |                             |
| <b>Model 1<sup>a,b</sup></b> | Ref                          | 0.01                         | 0.56                          | Ref                          | -1.09***                     | -1.93***                      | Ref                        | 0.45                       | -0.98                       | Ref                        | -1.70*                     | -3.19***                    |
| <b>Model 2<sup>a,b</sup></b> | Ref                          | 0.56                         | 1.46***                       | Ref                          | -0.50                        | -0.52                         | Ref                        | 0.82                       | 0.45                        | Ref                        | -1.06                      | -1.92*                      |
|                              | <b>Waist to hip ratio</b>    |                              |                               |                              |                              |                               |                            |                            |                             |                            |                            |                             |
| <b>Model 1<sup>a,b</sup></b> | Ref                          | -0.92**                      | -0.57                         | Ref                          | -1.02***                     | -1.89***                      | Ref                        | -0.83                      | -3.00**                     | Ref                        | -0.59                      | -3.13***                    |
| <b>Model 2<sup>a,b</sup></b> | Ref                          | -0.36                        | 0.28                          | Ref                          | -0.28                        | -0.40                         | Ref                        | 0.78                       | -0.07                       | Ref                        | -0.22                      | -1.86*                      |
|                              | <b>Predicted percent fat</b> |                              |                               |                              |                              |                               |                            |                            |                             |                            |                            |                             |
| <b>Model 1<sup>a,b</sup></b> | Ref                          | -0.69*                       | -0.19                         | Ref                          | -1.25***                     | -2.22***                      | Ref                        | -1.10                      | -3.36***                    | Ref                        | -1.91**                    | -3.61***                    |
| <b>Model 2<sup>a,b</sup></b> | Ref                          | -0.28                        | 0.72*                         | Ref                          | -0.50                        | -0.68*                        | Ref                        | 0.21                       | -0.95                       | Ref                        | -1.36                      | -2.22**                     |

<sup>a</sup> Model 1 is random effects model showing rate of decline (the interaction of each variable with follow-up time) adjusted for age (continuous), center (categorical), current smoker (yes / no), and prevalent coronary heart disease (yes / no) at baseline; model 3 additionally adjusted for hypertension medication (yes / no), systolic blood pressure (continuous), total cholesterol (continuous), high-density lipoprotein cholesterol (continuous), triglyceride (continuous, log transformed), education level (high school graduated / not graduated), and annual family income (categorical) at baseline.

<sup>b</sup> Black participants in the Minnesota and Washington County centers were excluded in the model because of small numbers.

\* indicates p<0.05, \*\* indicates p<0.01, \*\*\* indicates p<0.001.

**Table S2.** Difference in estimated glomerular filtration rate (eGFR) decline slope (unit: ml/min per 1.73 m<sup>2</sup> per decade) according to baseline obesity status tertile by sex and race among participants who had visit 6 information.

|                              | White (N=2,802)              |                        |                         |                        |                        |                         | Black (N=799)         |                        |                        |                        |                        |                         |
|------------------------------|------------------------------|------------------------|-------------------------|------------------------|------------------------|-------------------------|-----------------------|------------------------|------------------------|------------------------|------------------------|-------------------------|
|                              | Men (N=1,237)                |                        |                         | Women (N=1,565)        |                        |                         | Men (N=253)           |                        |                        | Women (N=546)          |                        |                         |
|                              | Low-tertile<br>(N=430)       | Mid-tertile<br>(N=412) | High-tertile<br>(N=395) | Low-tertile<br>(N=575) | Mid-tertile<br>(N=564) | High-tertile<br>(N=426) | Low-tertile<br>(N=73) | Mid-tertile<br>(N=102) | High-tertile<br>(N=78) | Low-tertile<br>(N=202) | Mid-tertile<br>(N=186) | High-tertile<br>(N=158) |
| <b>Attended visit 6, %</b>   | 26%                          | 25%                    | 24%                     | 31%                    | 31%                    | 23%                     | 17%                   | 23%                    | 16%                    | 29%                    | 26%                    | 21%                     |
|                              | <b>BMI</b>                   |                        |                         |                        |                        |                         |                       |                        |                        |                        |                        |                         |
| <b>Model 1<sup>a,b</sup></b> | Ref                          | 0.07                   | 0.42                    | Ref                    | -1.20***               | -1.57***                | Ref                   | 0.41                   | -0.14                  | Ref                    | -1.14                  | -3.02***                |
| <b>Model 2<sup>a,b</sup></b> | Ref                          | 0.45                   | 0.98**                  | Ref                    | -0.76*                 | -0.53                   | Ref                   | 0.08                   | -0.59                  | Ref                    | -1.10                  | -2.67**                 |
|                              | <b>Waist to hip ratio</b>    |                        |                         |                        |                        |                         |                       |                        |                        |                        |                        |                         |
| <b>Model 1<sup>a,b</sup></b> | Ref                          | -1.01**                | -0.08                   | Ref                    | -1.02***               | -1.40***                | Ref                   | -0.45                  | -0.55                  | Ref                    | -0.91                  | -2.11**                 |
| <b>Model 2<sup>a,b</sup></b> | Ref                          | -0.68*                 | 0.30                    | Ref                    | -0.41                  | -0.44                   | Ref                   | -0.37                  | -0.44                  | Ref                    | -0.92                  | -1.76*                  |
|                              | <b>Predicted percent fat</b> |                        |                         |                        |                        |                         |                       |                        |                        |                        |                        |                         |
| <b>Model 1<sup>a,b</sup></b> | Ref                          | -0.43                  | 0.10                    | Ref                    | -1.05***               | -1.65***                | Ref                   | -0.85                  | -1.09                  | Ref                    | -1.81**                | -3.55***                |
| <b>Model 2<sup>a,b</sup></b> | Ref                          | -0.16                  | 0.66                    | Ref                    | -0.53                  | -0.56                   | Ref                   | -1.02                  | -1.37                  | Ref                    | -1.98**                | -3.32***                |

<sup>a</sup> Model 1 is random effects model showing rate of decline (the interaction of each variable with follow-up time) adjusted for age (continuous), center (categorical), current smoker (yes / no), and prevalent coronary heart disease (yes / no) at baseline; model 2 additionally adjusted for hypertension medication (yes / no), systolic blood pressure (continuous), total cholesterol (continuous), high-density lipoprotein cholesterol (continuous), triglyceride (continuous, log transformed), education level (high school graduated / not graduated), and annual family income (categorical) at baseline.

<sup>b</sup> Black participants in the Minnesota and Washington County centers were excluded in the model because of small numbers.

\* indicates p<0.05, \*\* indicates p<0.01, \*\*\* indicates p<0.001.

**Table S3.** Association of estimated glomerular filtration rate (eGFR) decline slope (unit: ml/min per 1.73 m<sup>2</sup> per decade) with three measures of baseline obesity by sex and race excluding current smokers.

|                              | White (N=1,0222)                                                 |                         | Black (N=3,274)       |                         |
|------------------------------|------------------------------------------------------------------|-------------------------|-----------------------|-------------------------|
|                              | Men (N=3,608)                                                    | Women (N=4,081)         | Men (N=782)           | Women (N=1,490)         |
|                              | <b>BMI<sup>c</sup>, per standard deviation</b>                   |                         |                       |                         |
| <b>Model 1<sup>a,b</sup></b> | -0.05 (-0.33, 0.23)                                              | -0.84 (-1.08, -0.59)*** | -0.34 (-1.28, 0.61)   | -1.60 (-2.20, -1.00)*** |
| <b>Model 2<sup>a,b</sup></b> | 0.31 (0.02, 0.61)*                                               | -0.27 (-0.53, 0.001)    | 0.11 (-0.87, 1.09)    | -1.22 (-1.86, -0.58)*** |
|                              | <b>Waist to hip ratio<sup>c</sup>, per standard deviation</b>    |                         |                       |                         |
| <b>Model 1<sup>a,b</sup></b> | -0.35 (-0.62, -0.07)*                                            | -0.70 (-0.94, -0.46)*** | -1.17 (-2.10, -0.24)* | -1.47 (-2.06, -0.87)*** |
| <b>Model 2<sup>a,b</sup></b> | -0.07 (-0.35, 0.22)                                              | -0.12 (-0.39, 0.14)     | -0.51 (-1.52, 0.51)   | -1.24 (-1.89, -0.59)*** |
|                              | <b>Predicted percent fat<sup>c</sup>, per standard deviation</b> |                         |                       |                         |
| <b>Model 1<sup>a,b</sup></b> | -0.27 (-0.55, 0.01)                                              | -0.92 (-1.17, -0.68)*** | -0.83 (-1.79, 0.13)   | -1.67 (-2.27, -1.07)*** |
| <b>Model 2<sup>a,b</sup></b> | 0.07 (-0.22, 0.37)                                               | -0.31 (-0.58, -0.04)*   | -0.30 (-1.32, 0.72)   | -1.29 (-1.94, -0.65)*** |

<sup>a</sup> Model 1 is random effects model showing rate of decline (the interaction of each variable with follow-up time) adjusted for age (continuous), center (categorical), and prevalent coronary heart disease (yes / no) at baseline; model 2 additionally adjusted for hypertension medication (yes / no), systolic blood pressure (continuous), total cholesterol (continuous), high-density lipoprotein cholesterol (continuous), triglyceride (continuous, log transformed), education level (high school graduated / not graduated), and annual family income (categorical) at baseline.

<sup>b</sup> Black participants in the Minnesota and Washington County centers were excluded in the model because of small numbers.

<sup>c</sup> Centered at median of each race-gender group.

<sup>d</sup> Estimate (95% confidence interval) for all such values.

\* indicates p<0.05, \*\* indicates p<0.01, \*\*\* indicates p<0.001.

**Table S4.** Subhazard ratios for end-stage kidney disease (KFRT) according to baseline obesity status by sex and race with using a Fine-Gray competing risk model.

|                                    | White (n/N=95/1,0222)                                            |                      | Black (N=95/3,274)   |                      |
|------------------------------------|------------------------------------------------------------------|----------------------|----------------------|----------------------|
|                                    | Men (n/N=57/4,802)                                               | Women (n/N=43/5,420) | Men (n/N=39/1,270)   | Women (n/N=56/2,004) |
|                                    | <b>Body mass index<sup>c,d</sup>, per standard deviation</b>     |                      |                      |                      |
| <b>Mean (SD), kg/m<sup>2</sup></b> | 27.23 (3.86)                                                     | 26.33 (5.09)         | 27.28 (4.53)         | 30.29 (6.36)         |
| <b>Model 1<sup>a,b</sup></b>       | 1.21 (0.96, 1.54)                                                | 1.46 (1.17, 1.83)*** | 1.73 (1.31, 2.28)*** | 1.61 (1.28, 2.02)*** |
| <b>Model 2<sup>a,b</sup></b>       | 1.05 (0.82, 1.35)                                                | 1.05 (0.81, 1.36)    | 1.51 (1.07, 2.13)*   | 1.58 (1.24, 2.03)*** |
|                                    | <b>Waist to hip ratio<sup>c</sup>, per standard deviation</b>    |                      |                      |                      |
| <b>Mean (SD)</b>                   | 0.97 (0.05)                                                      | 0.89 (0.08)          | 0.94 (0.05)          | 0.90 (0.08)          |
| <b>Model 1<sup>a,b</sup></b>       | 1.05 (0.80, 1.37)                                                | 1.70 (1.19, 2.43)**  | 1.78 (1.19, 2.65)**  | 1.70 (1.29, 2.24)*** |
| <b>Model 2<sup>a,b</sup></b>       | 0.91 (0.69, 1.19)                                                | 1.27 (0.87, 1.86)    | 1.5 (0.97, 2.31)     | 1.67 (1.21, 2.3)**   |
|                                    | <b>Predicted percent fat<sup>c</sup>, per standard deviation</b> |                      |                      |                      |
| <b>Mean (SD), %</b>                | 28.49 (3.88)                                                     | 39.99 (4.92)         | 26.31 (4.65)         | 41.83 (5.99)         |
| <b>Model 1<sup>a,b</sup></b>       | 1.11 (0.85, 1.46)                                                | 1.67 (1.30, 2.15)*** | 1.74 (1.30, 2.34)*** | 1.59 (1.29, 1.96)*** |
| <b>Model 2<sup>a,b</sup></b>       | 0.96 (0.73, 1.25)                                                | 1.27 (0.92, 1.75)    | 1.44 (1.02, 2.03)*   | 1.53 (1.21, 1.93)*** |

<sup>a</sup> Model 1 adjusted for age (continuous), center (categorical), current smoker (yes / no), and prevalent coronary heart disease (yes / no) at baseline; model 2 additionally adjusted for hypertension medication (yes / no), systolic blood pressure (continuous), total cholesterol (continuous), high-density lipoprotein cholesterol (continuous), triglyceride (continuous, log transformed), estimated glomerular filtration rate (continuous), education level (high school graduated / not graduated), and annual family income (categorical) at baseline.

<sup>b</sup> Black participants in the Minnesota and Washington County centers were excluded in the model because of small numbers.

<sup>c</sup> Centered at median of each race-gender group.

<sup>d</sup> Hazard ratio (95% confidence interval) for all such values.

\* indicates  $p < 0.05$ , \*\* indicates  $p < 0.01$ , \*\*\* indicates  $p < 0.001$ .
